# Supplementary material for: Genotype × Environment Interactions of Yield Traits in Backcross Introgression Lines Derived from Oryza sativa cv. Swarna/Oryza nivara
Source: PubMed Central journal article supplement (PMC5070172; doi:10.3389/fpls.2016.01530), 2016-10-19

**Supplementary Fig.2** Polygon views of the GGE biplot based on symmetrical scaling for ‘which-won-where’ pattern of rice genotypes in three environments

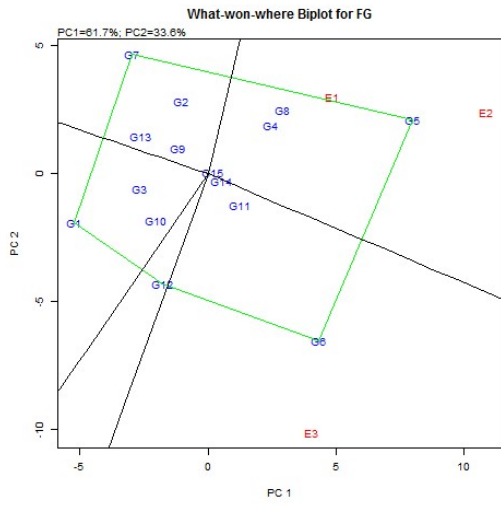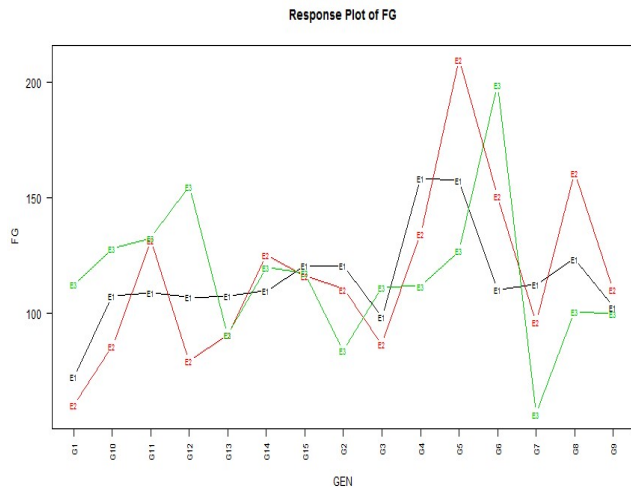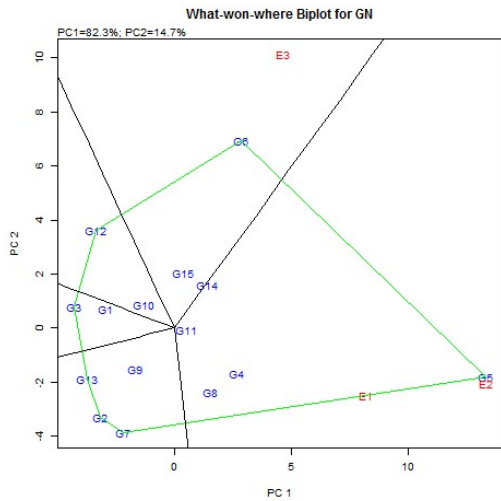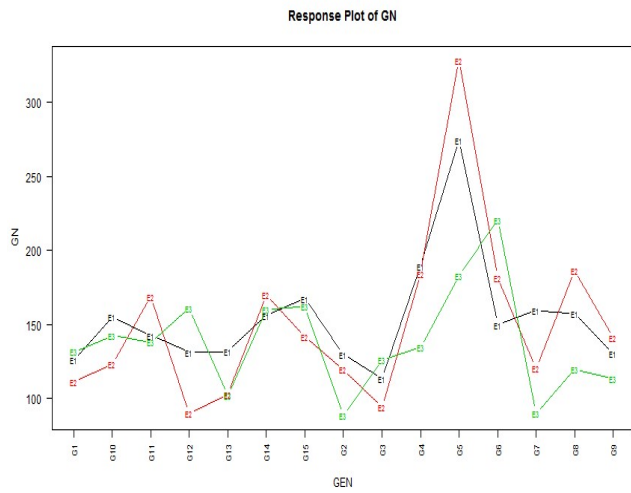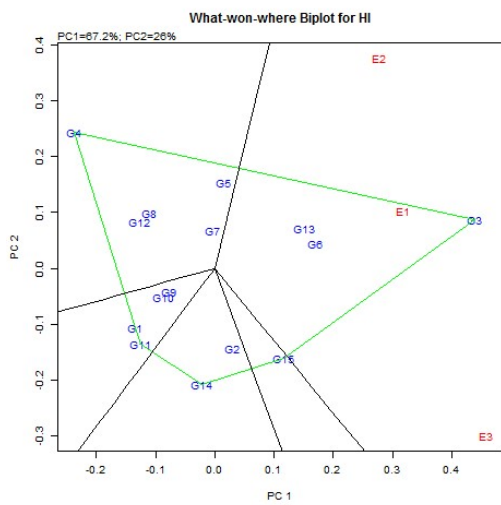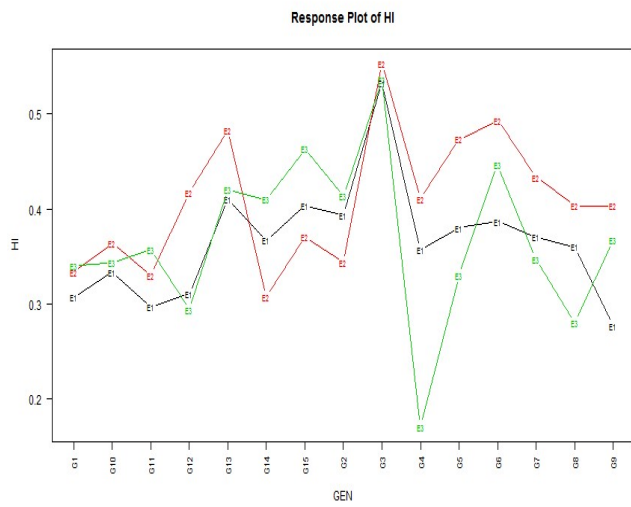

**Supplementary Fig.2** Polygon views of the GGE biplot based on symmetrical scaling for ‘which-won-where’ pattern of rice genotypes in three environments

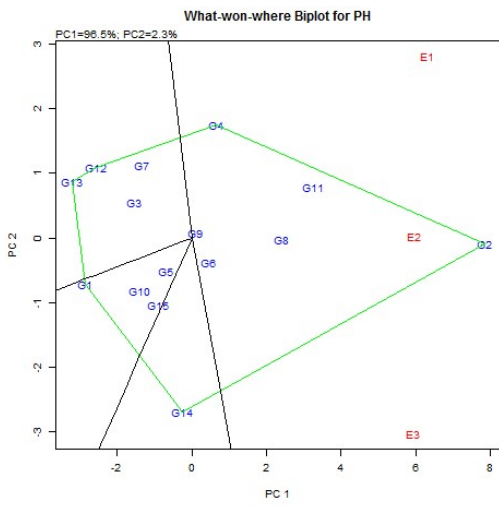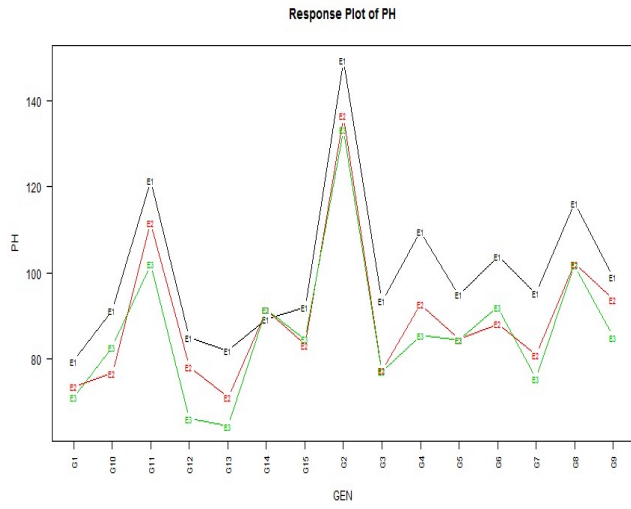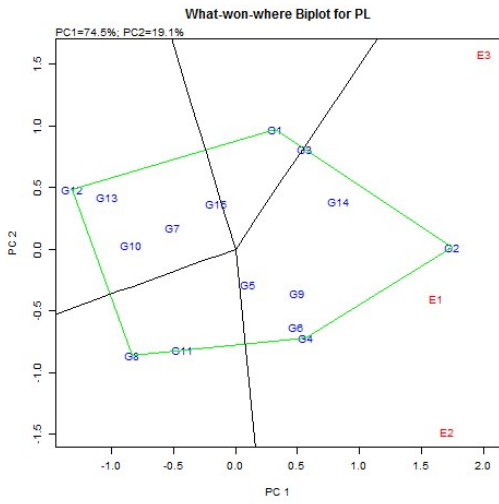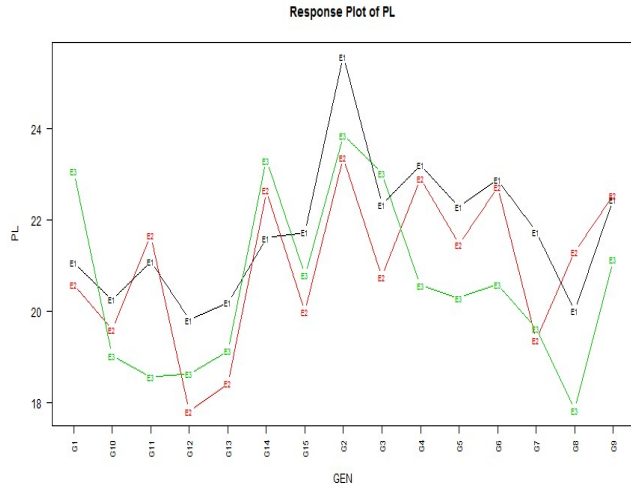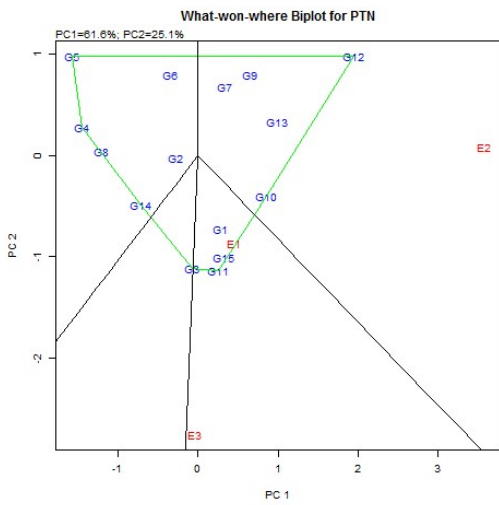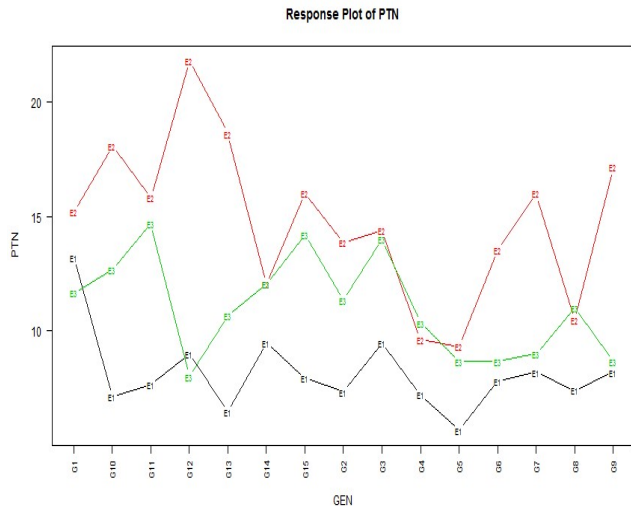

**Supplementary Fig.2** Polygon views of the GGE biplot based on symmetrical scaling for ‘which-won-where’ pattern of rice genotypes in three environments

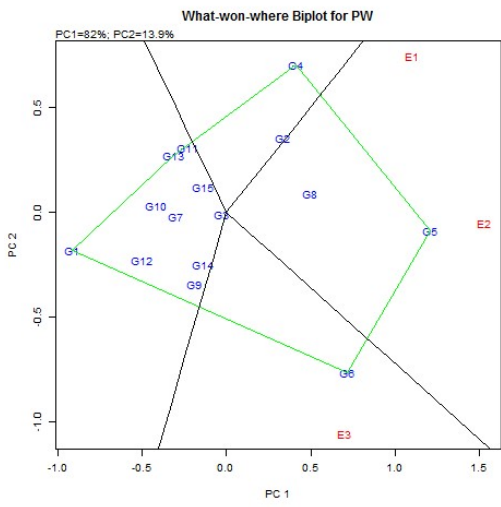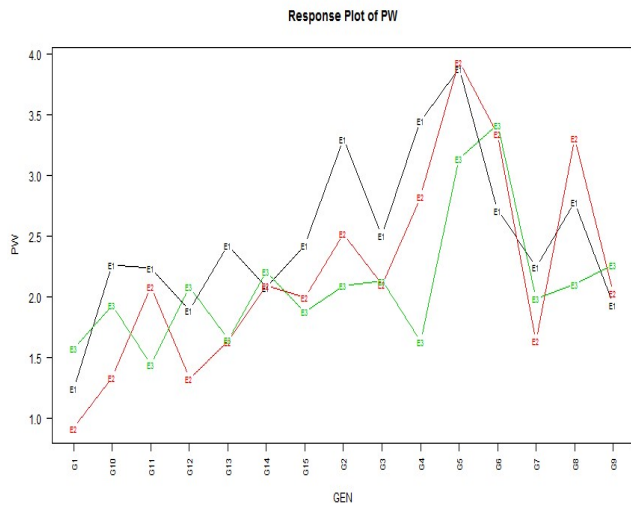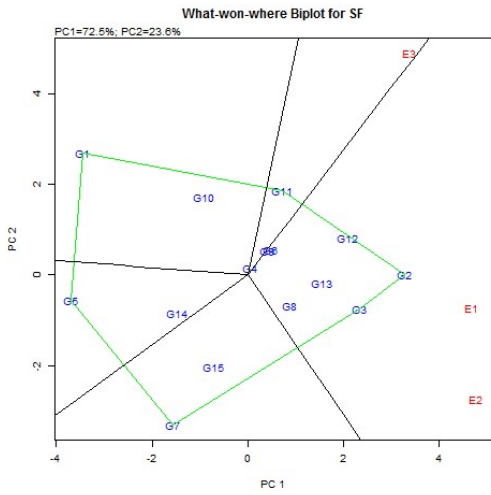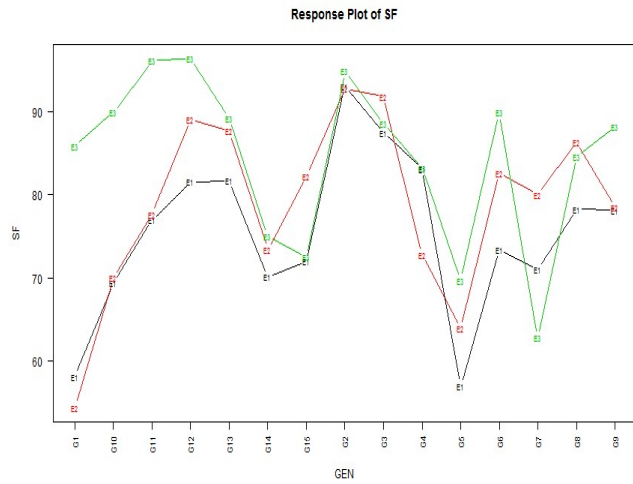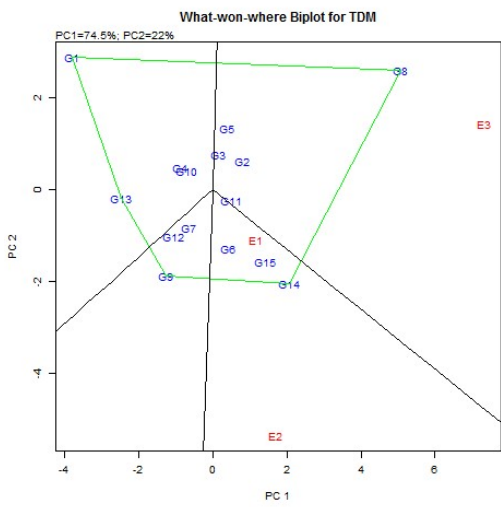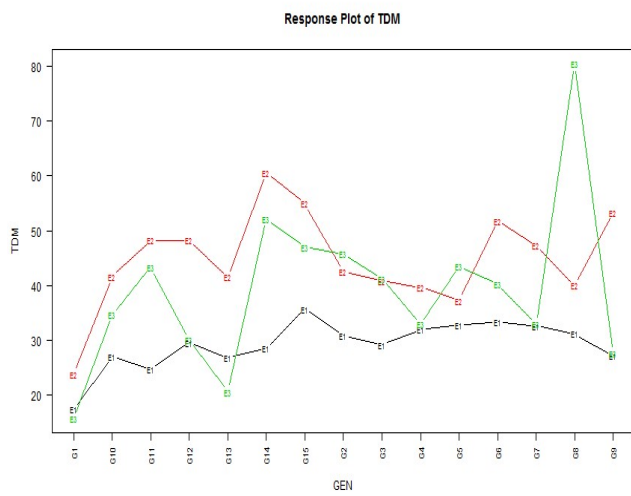

**Supplementary Fig.2** Polygon views of the GGE biplot based on symmetrical scaling for ‘which-won-where’ pattern of rice genotypes in three environments

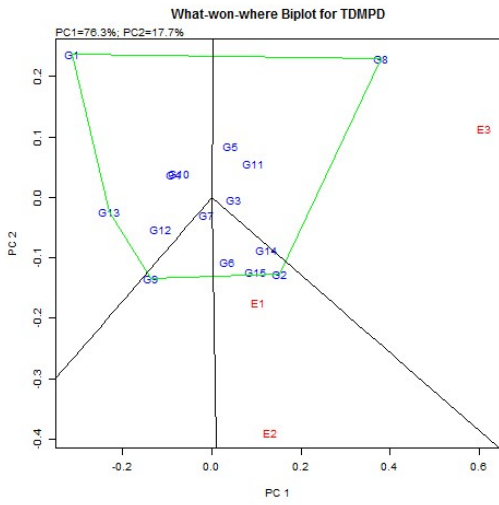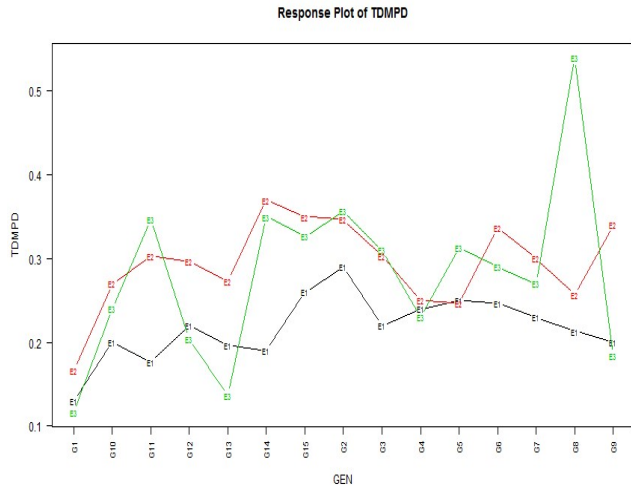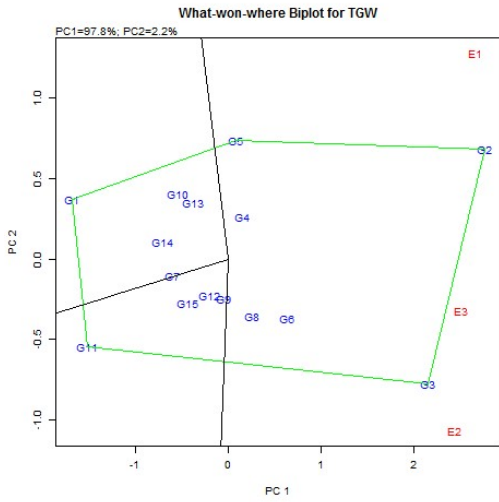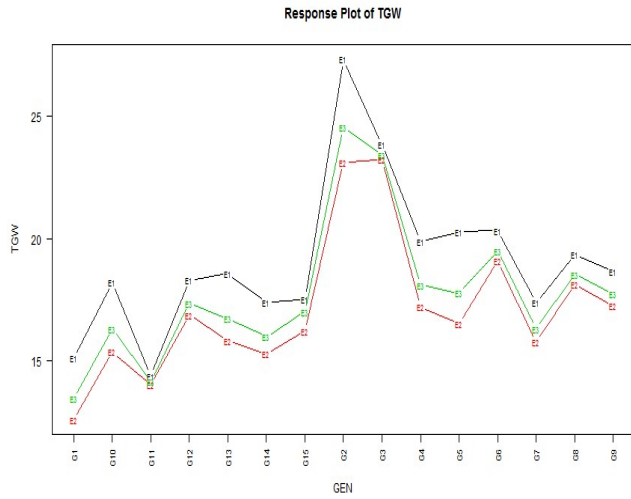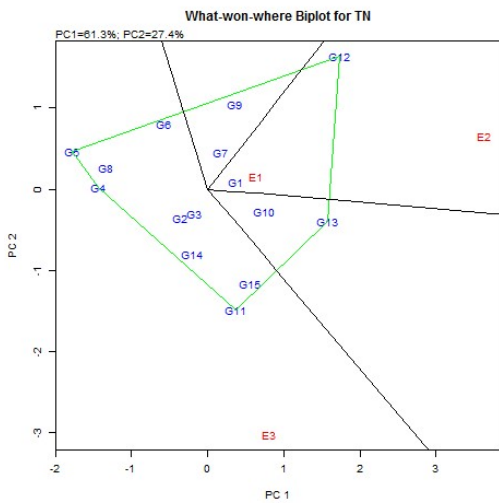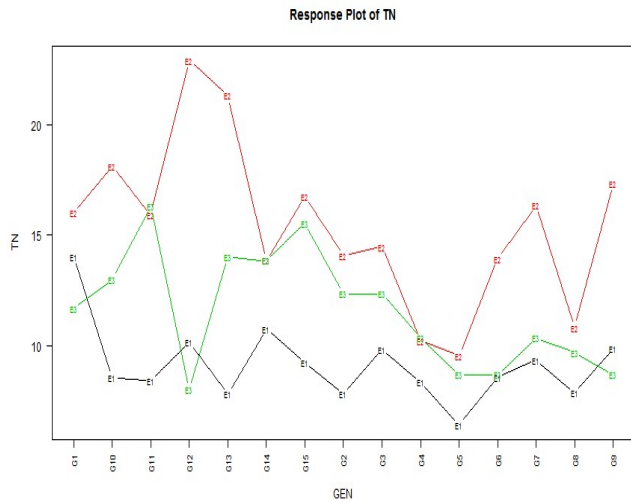

Supplement: DataSheet2.pdf [file DataSheet2.pdf]
