# Supplementary material for: Genotype × Environment Interactions of Yield Traits in Backcross Introgression Lines Derived from Oryza sativa cv. Swarna/Oryza nivara
Source: PubMed Central journal article supplement (PMC5070172; doi:10.3389/fpls.2016.01530), 2016-10-19

**Supplementary Fig.1** AMMI and GGE biplot for the primary component of interaction (PC1) and mean yield(t/ha) or main effect of rice genotypes in different seasons

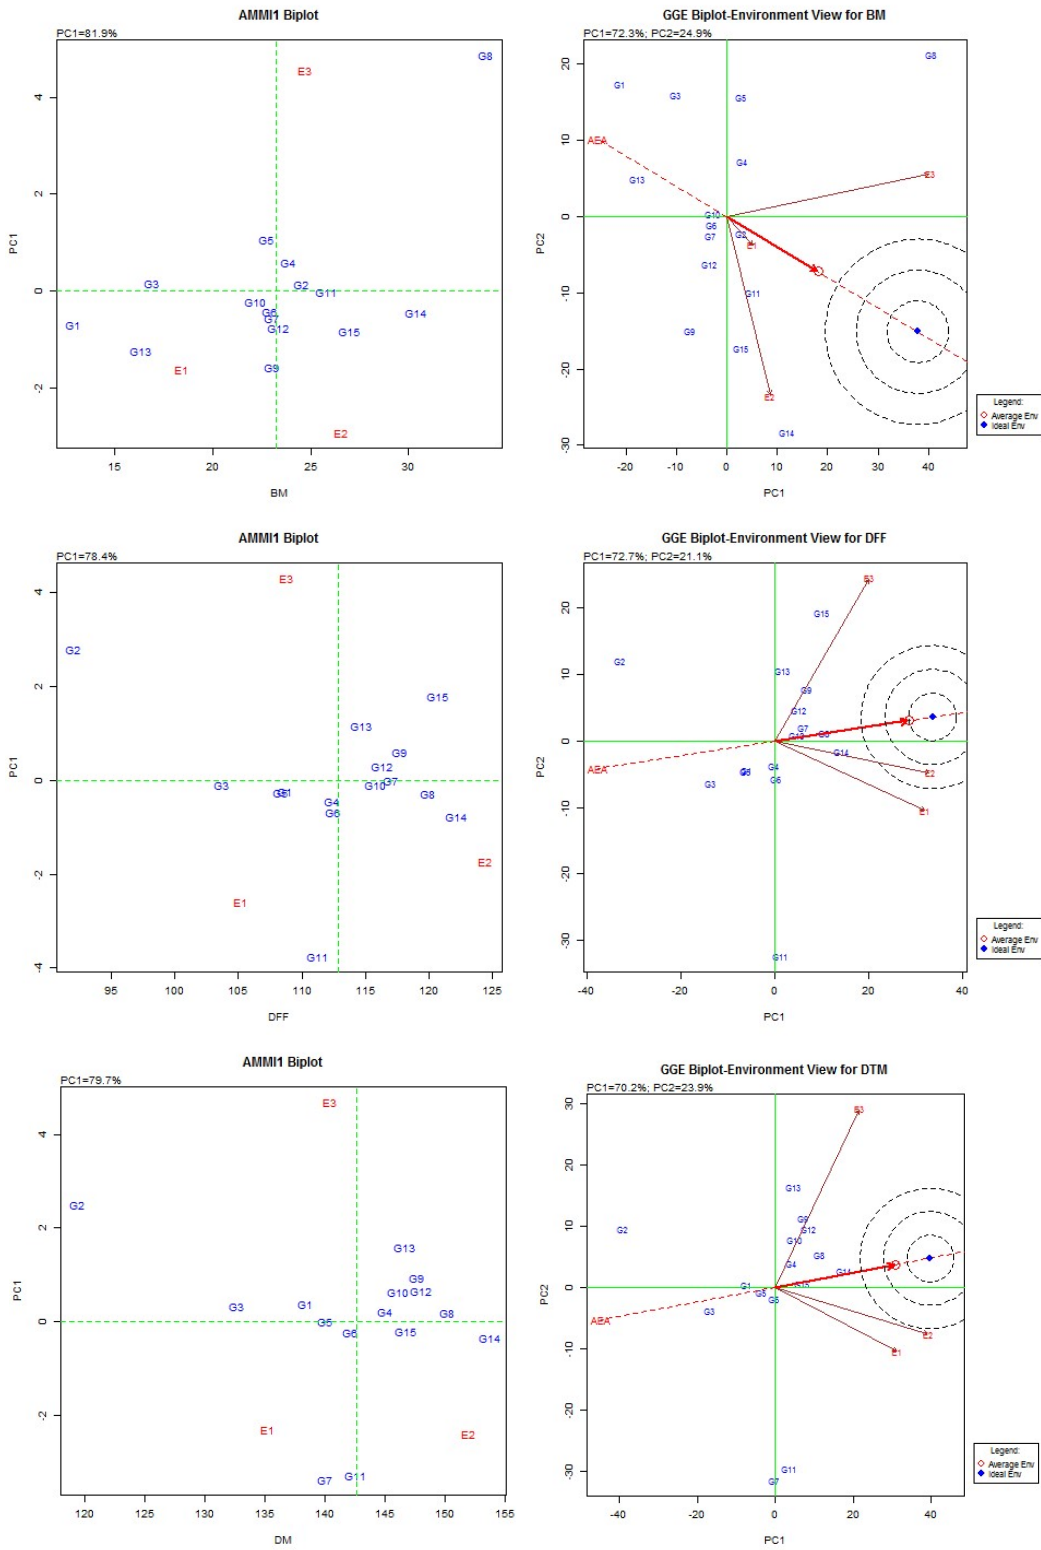

**Supplementary Fig.1** AMMI and GGE biplot for the primary component of interaction (PC1) and mean yield(t/ha) or main effect of rice genotypes in differet seasons

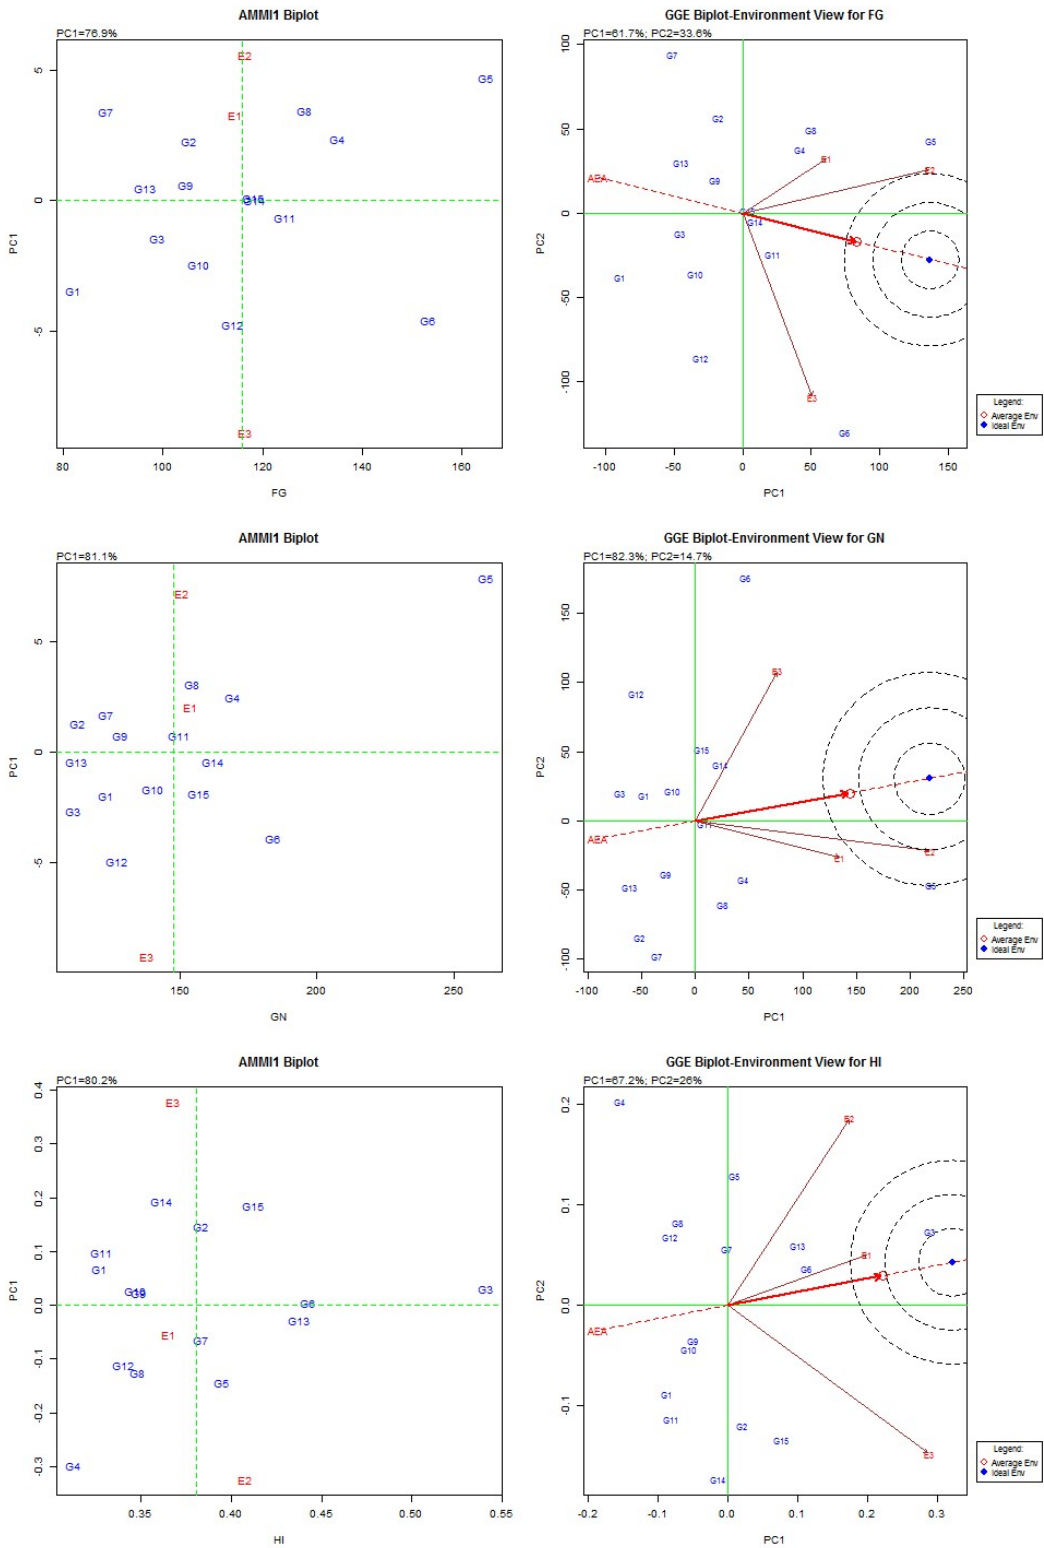

**Supplementary Fig.1** AMMI and GGE biplot for the primary component of interaction (PC1) and mean yield(t/ha) or main effect of rice genotypes in differet seasons

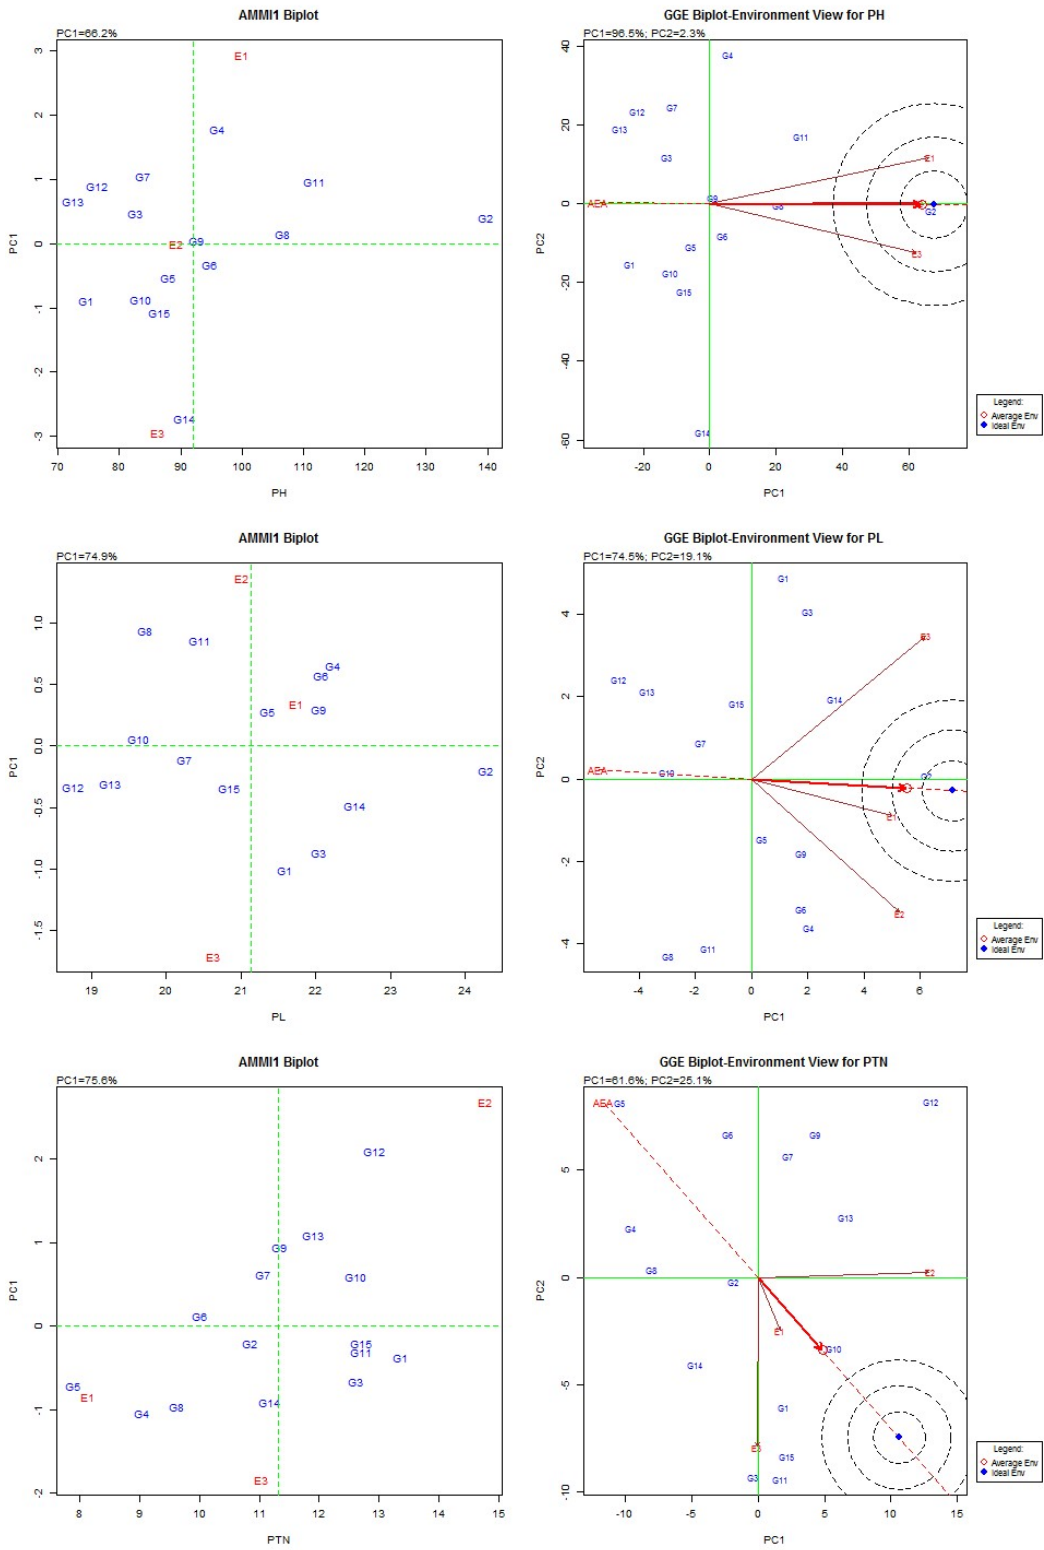

**Supplementary Fig.1** AMMI and GGE biplot for the primary component of interaction (PC1) and mean yield(t/ha) or main effect of rice genotypes in differet seasons

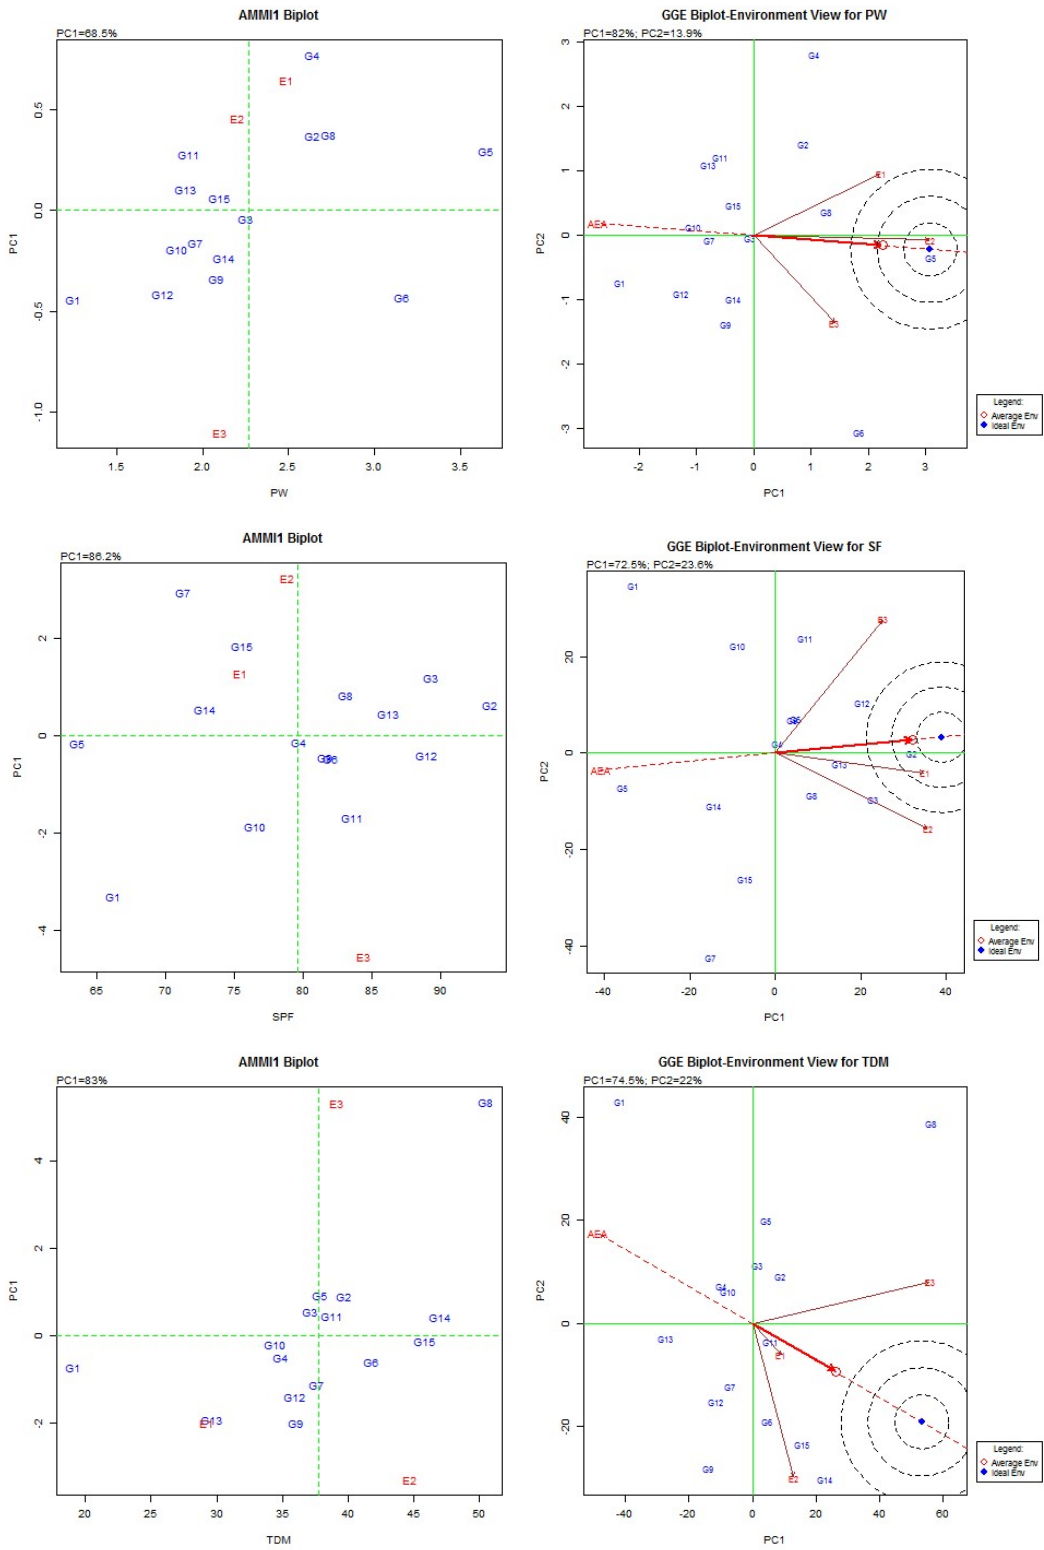

**Supplementary Fig.1** AMMI and GGE biplot for the primary component of interaction (PC1) and mean yield(t/ha) or main effect of rice genotypes in differet seasons

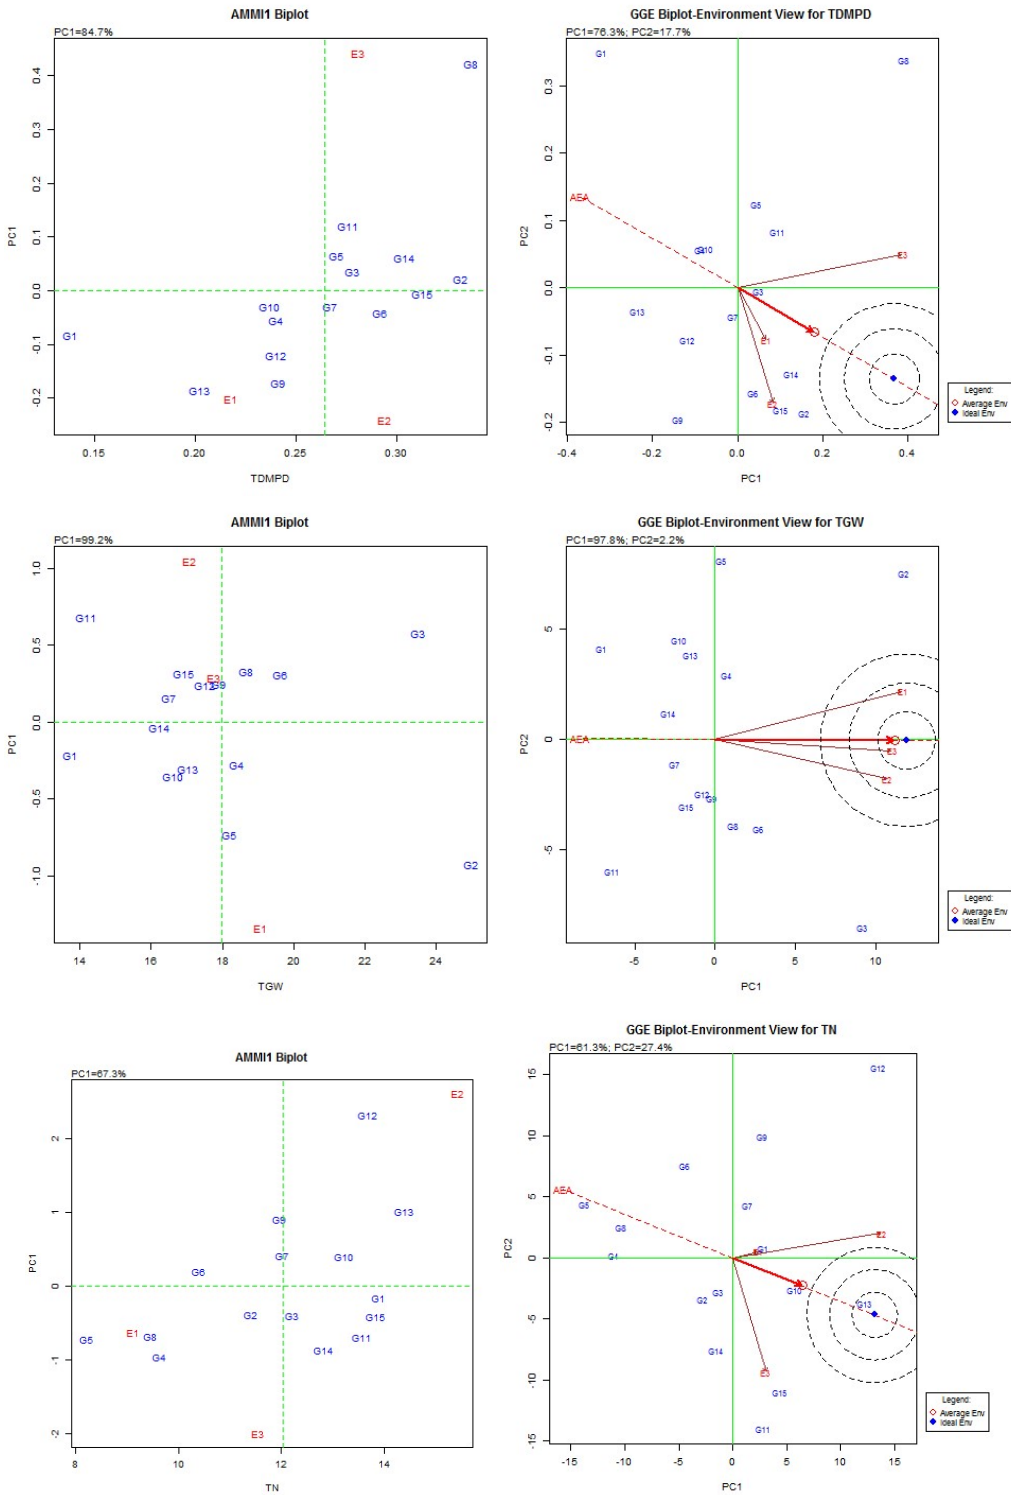

Supplement: DataSheet1.pdf [file DataSheet1.pdf]
