# Supplementary material for: Genotype × Environment Interactions of Yield Traits in Backcross Introgression Lines Derived from Oryza sativa cv. Swarna/Oryza nivara
Source: PubMed Central journal article supplement (PMC5070172; doi:10.3389/fpls.2016.01530), 2016-10-19

**Supplementary Fig.3** Box plot representation of genotypic performance across seasons

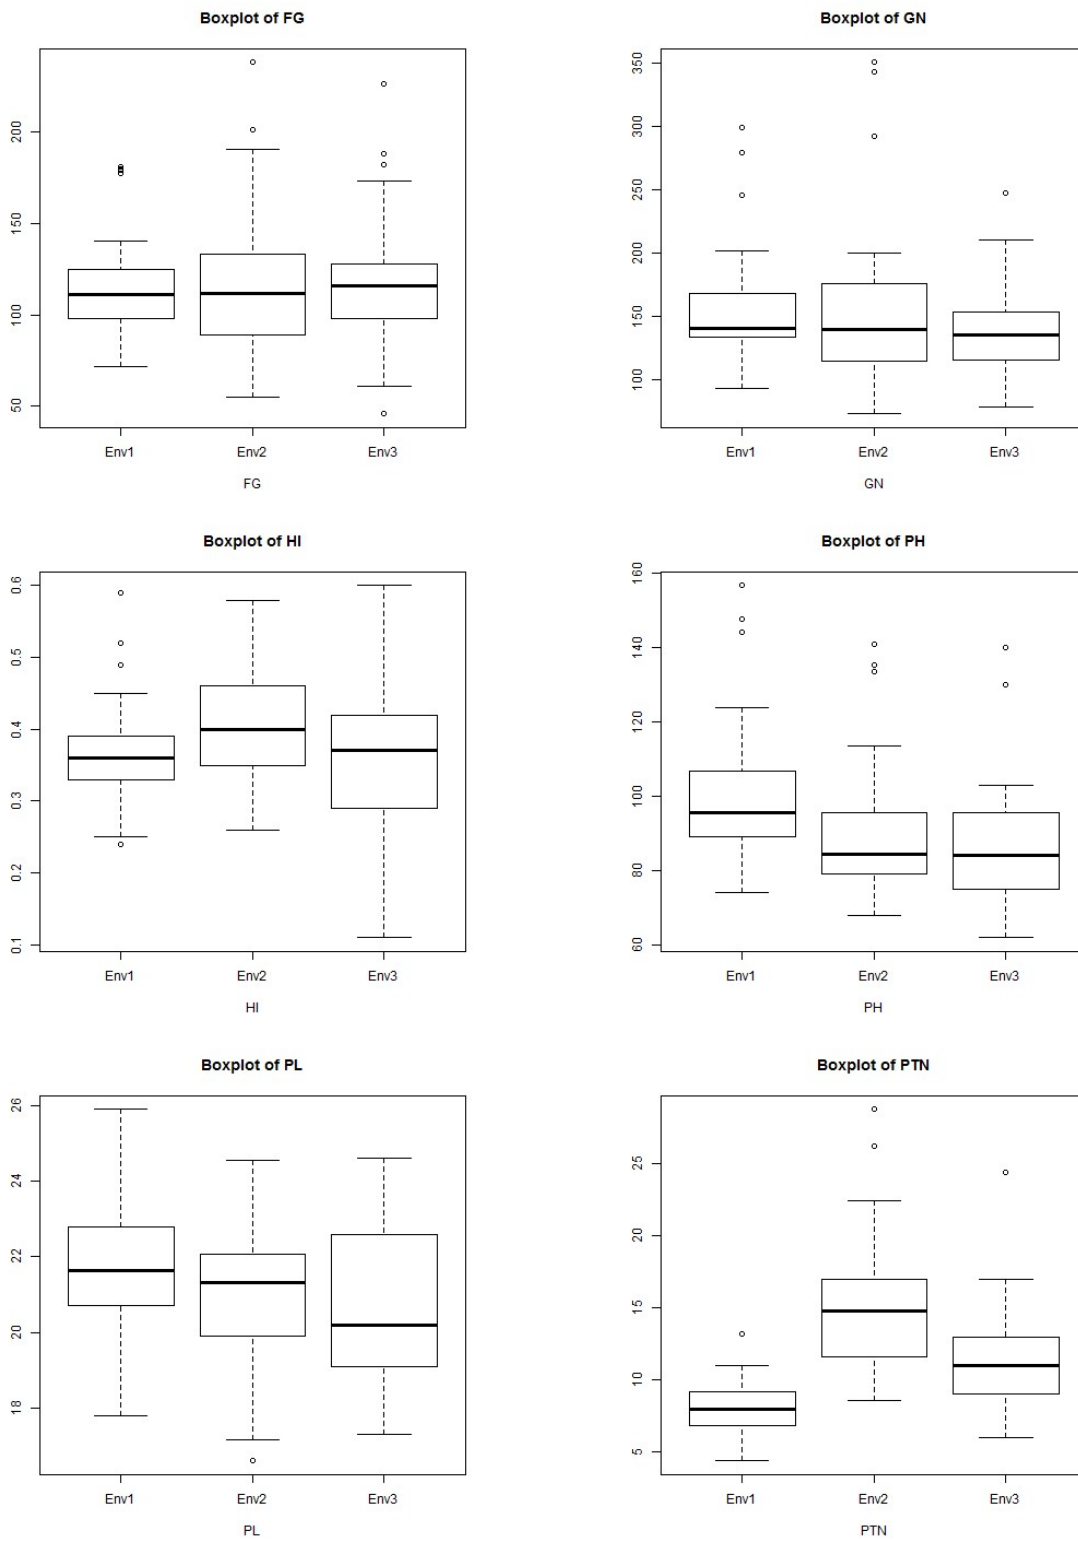

**Supplementary Fig.3** Box plot representation of genotypic performance across seasons

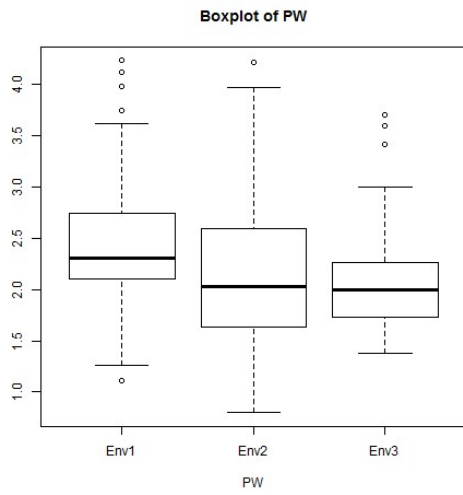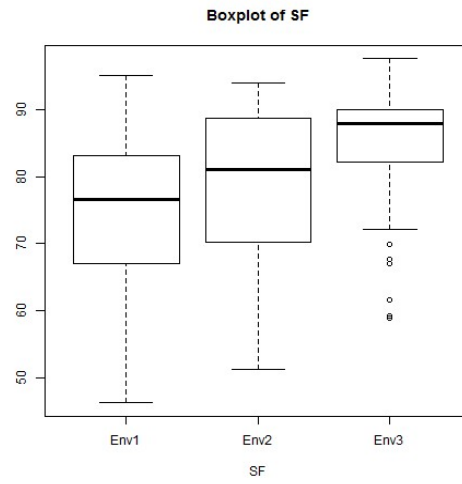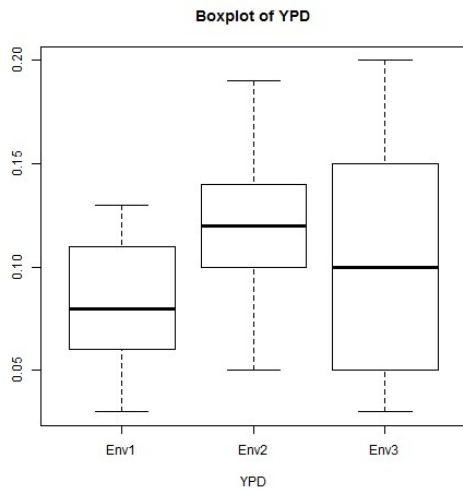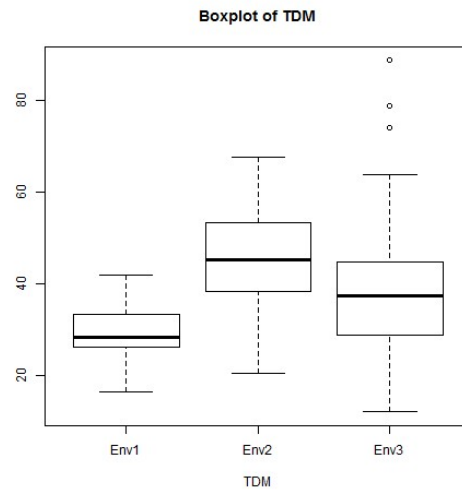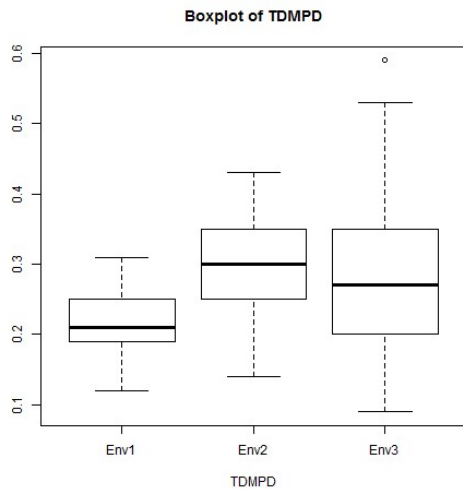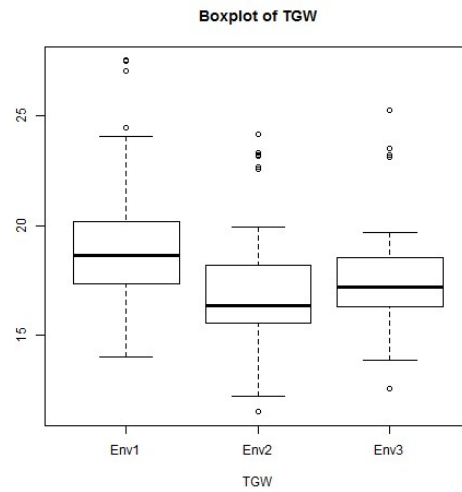

Supplement: DataSheet3.pdf [file DataSheet3.pdf]
