# Supplementary material for: Genotype × Environment Interactions of Yield Traits in Backcross Introgression Lines Derived from Oryza sativa cv. Swarna/Oryza nivara
Source: PubMed Central journal article supplement (PMC5070172; doi:10.3389/fpls.2016.01530), 2016-10-19
Supplement: DataSheet4.pdf [file DataSheet4.pdf]

**Supplementary table 1 . List of polymorphic markers used in the study**

| <b>SSR</b> | <b>Chromosome number</b> | <b>Forward primer</b>     | <b>Reverse primer</b>  | <b>Repeat motifs</b> | <b>Size</b> | <b>Position (CM)</b> | <b>Anneal Temperature</b> |
|------------|--------------------------|---------------------------|------------------------|----------------------|-------------|----------------------|---------------------------|
| RM 5       | 1                        | TGCAACTTCTAGCTGCTCGA      | GCATCCGATCTTGATGGG     | (GA)14               | 113         | 117.8                | 55                        |
| RM9        | 1                        | GGTGCCATTGTCGTCCTC        | ACGGCCCTCATCACCTTC     | (GA)15GT(GA)2        | 136         | 92.4                 | 55                        |
| RM495      | 1                        | ATGATGATGGACGACGACAACG    | TGAATCCAAGGTGCAGAGATGG | (CTG)7               | 159         | 2.8                  | 55                        |
| RM1        | 1                        | GCGAAAACACAATGCAAAAA      | GCGTTGGTTGGACCTGAC     | (GA)26               | 113         | 29.7                 | 55                        |
| RM259      | 1                        | TGGAGTTTGAGAGGAGGG        | CTTGTTGCATGGTGCCATGT   | (CT)17               | 162         | 54.2                 | 55                        |
| RM237      | 1                        | CAAATCCCAGCTGCTGTCC       | TGGGAAGAGAGCACTACAGC   | (CT)18               | 130         | 115.2                | 55                        |
| RM212      | 1                        | CCACTTTCAGCTACTACCAG      | CACCCATTTGTCTCTCATTATG | (CT)24               | 75          | 148.7                | 55                        |
| RM226      | 1                        | AGCTAAGGTCTGGGAGAAACC     | AAGTAGGATGGGGCACAAGCTC | (AT)38               | 274         | 154.8                | 55                        |
| RM431      | 1                        | TCCTGCGAACTGAAGAGTTG      | AGAGCAAAAACCCTGGTTCAC  | (AG)16               | 251         | 178.3                | 55                        |
| RM3874     | 2                        | TGGGTGATCTTAGTTTGCC       | AATGTGCCTGCACATGTCAC   | (GA)51               | 206         | 94.3                 | 55                        |
| RM6318     | 2                        | TGCTGCTTCTGTCCAGTGAG      | GGATCATAACAAGTGCCTCG   | (CTT)12              | 199         | 96.6                 | 55                        |
| RM106      | 2                        | CGTCTTCATCATCGTCGCCCCG    | GGCCCATCCCGTCGTGGATCTC | (GAA)5               | 253         | 123.2                | 55                        |
| RM250      | 2                        | GGTTCAAACCAAGCTGATCA      | GATGAAGGCCTTCCACGCAG   | (CT)17               | 153         | 170.1                | 55                        |
| RM213      | 2                        | ATCTGTTTGCAGGGGACAAG      | AGGTCTAGACGATGTCGTGA   | (CT)17               | 139         | 186.4                | 55                        |
| RM207      | 2                        | CCATTCGTGAGAAGATCTGA      | CACCTCATCCTCGTAACGCC   | (CT)25               | 118         | 191.2                | 55                        |
| RM48       | 2                        | TGTCCCACTGCTTTCAAGC       | CGAGAATGAGGGACAAATAACC | (GA)17               | 204         | 190.2                | 55                        |
| RM535      | 2                        | ACTACATACACGGCCCTTGC      | CTACGTGGACACCGTCACAC   | (AG)11               | 138         | 195.7                | 55                        |
| RM166      | 2                        | GGTCTGGGTCAATAATTGGGTTACC | TTGCTGCATGATCCTAAACCGG | (T)12                | 321         | 183                  | 61                        |
| RM3688     | 2                        | GTTGAATCAAGCTGTGCAGC      | AGCTAGGCAAAGCATGCATG   | (GA)15               | 111         | 88.2                 | 50                        |
| RM1920     | 2                        | CAAACACAGTGTTGACAGAA      | GCTATTGACTTATCCGTTCA   | (AT)18               | 127         | 103.4                | 55                        |
| RM6318     | 2                        | TGCTGCTTCTGTCCAGTGAG      | GGATCATAACAAGTGCCTCG   | (CTT)12              | 199         | 96.6                 | 55                        |
| RM231      | 3                        | CCAGATTATTTCTGAGGTC       | CACTTGCATAGTTCTGCATTG  | (CT)16               | 182         | 15.7                 | 55                        |
| RM251      | 3                        | GAATGGCAATGGCGCTAG        | ATGCGGTTCAAGATTTCGATC  | (CT)29               | 147         | 79.1                 | 55                        |
| RM16       | 3                        | CGCTAGGGCAGCATCTAAA       | AACACAGCAGGTACGCGC     | (TCG)5(GA)16         | 181         | 131.5                | 55                        |
| RM55       | 3                        | CCGTCGCCGTAGTAGAGAAG      | TCCCGGTTATTTTAAGGCG    | (GA)17               | 226         | 168.2                | 55                        |
| RM1352     | 3                        | ACGAGTTGTA CTCTGGTTGC     | TCTCGGTTTTTATCTTGCTG   | (AG)23               | 219         | 145.6                | 55                        |
| RM514      | 3                        | AGATTGATCTCCATTCCCC       | CACGAGCATATTACTAGTGG   | (AC)12               | 259         | 216.4                | 55                        |
| RM565      | 3                        | AGTAACGAGCATAGCAGGCG      | GCAAAGCCTTCAGGAATCAG   | (GA)11               | 172         | 215.5                | 55                        |
| RM570      | 3                        | GTTCTTCAACTCCCAGTGCG      | TGACGATGTGGAAGAGCAAG   | (AG)15               | 208         | 221.1                | 55                        |
| RM85       | 3                        | CCAAAGATGAAACCTGGATTG     | GCACAAGGTGAGCAGTCC     | (TGG)5(TCT)12        | 45          | 231                  | 55                        |
| RM551      | 4                        | AGCCCAGACTAGCATGATTG      | GAAGGCGAGAAGGATCACAG   | (AG)18               | 153         | 8.5                  | 55                        |

|        |    |                          |                          |                         |     |       |    |
|--------|----|--------------------------|--------------------------|-------------------------|-----|-------|----|
| RM32   | 4  | AGTCTACGTGGTGTACACGTGG   | TGCGGCCTGCCGTTTGTGAG     | (TC)3A(CT)9(TC)5        | 168 | 4.2   | 55 |
| RM307  | 4  | GTACTIONGACCTACCGTTCAC   | CTGCTATGCATGAACTGCTC     | (AT)14(GT)21            | 174 | 0     | 55 |
| RM348  | 4  | CCGCTACTAATAGCAGAGAG     | GGAGCTTTGTTCTTGCGAAC     | (CAG)7                  | 103 | 160.8 | 55 |
| RM122  | 5  | GAGTCGATGTAATGTCATCAGTGC | GAAGGAGGTATCGCTTTGTTGGAC | (GA)7A(GA)2A(GA)11      | 227 | 2.2   | 55 |
| RM574  | 5  | GGCGAATTCTTTGCACTTGG     | ACGGTTTGGTAGGGTGTAC      | (GA)11                  | 155 | 41    | 55 |
| RM8039 | 5  | CGTACGTACTTATATCTCAT     | AAATCTAATGTATCTGAGGT     | (TTA)57                 | 260 | 13.3  | 55 |
| RM163  | 5  | ATCCATGTGCGCCTTTATGAGGA  | CGCTACCTCCTTCACTTACTAGT  | (GGAGA)4(GA)11C(GA)20   | 130 | 91.4  | 55 |
| RM31   | 5  | GATCACGATCCACTGGAGCT     | AAGTCCATTACTCTCCTCCC     | (GA)15                  | 140 | 134.9 | 55 |
| RM13   | 5  | TCCAACATGGCAAGAGAGAG     | GGTGGCATTGATTCCAG        | (GA)6-(GA)16            | 141 | 28.6  | 55 |
| RM510  | 6  | AACCGGATTAGTTTCTCGCC     | TGAGGACGACGAGCAGATTC     | (GA)15                  | 121 | 20.8  | 55 |
| RM204  | 6  | GTGACTGACTTGGTCATAGGG    | GCTAGCCATGCTCTCGTACC     | (CT)44                  | 169 | 25.1  | 55 |
| RM162  | 6  | GCCAGCAAACCAGGGATCCGG    | CAAGGTCTTGTGCGGCTTGCGG   | (AC)20                  | 186 | 108.3 | 61 |
| RM125  | 7  | ATCAGCAGCCATGGCAGCGACC   | AGGGGATCATGTGCCGAAGGCC   | (GCT)8                  | 127 | 24.8  | 55 |
| RM214  | 7  | CTGATGATAGAAACCTCTTCTC   | AAGAACAGCTGACTTCACAA     | (CT)14                  | 108 | 34.7  | 55 |
| RM11   | 7  | TCTCCTCTTCCCCCGATC       | ATAGCGGGCGAGGCTTAG       | (GA)17                  | 91  | 47    | 55 |
| RM1132 | 7  | ATCACCTGAGAAACATCCGG     | CTCCTCCCACGTCAAGGTC      | (AG)12                  | 93  | 83.3  | 55 |
| RM248  | 7  | TCCTTGTGAAATCTGGTCCC     | GTAGCCTAGCATGGTGCATG     | (CT)25                  | 82  | 144.1 | 55 |
| RM408  | 8  | CAACGAGCTAACTTCCGTCC     | ACTGCTACTTGGGTAGCTGACC   | (CT)13                  | 128 | 0     | 55 |
| RM3819 | 8  | ACCTCACCTGTGGATCTTGG     | CAATCCCCTTCTCCTTCC       | (GA)20                  | 208 | 3     | 55 |
| RM25   | 8  | GGAAAGAATGATCTTTTCATGG   | CTACCATCAAACCAATGTTC     | (GA)18                  | 146 | 52.2  | 55 |
| RM1384 | 8  | TTAATCCATCCTGTAGCTGG     | TCGCTATCAACACTACCTGC     | (AG)36                  | 178 | 11.8  | 55 |
| RM223  | 8  | GAGTGAGCTTGGGCTGAAAC     | GAAGGCAAGTCTTGGCACTG     | (CT)25                  | 165 | 80.5  | 55 |
| RM284  | 8  | ATCTCTGATACTCCATCCATCC   | CCTGTACGTTGATCCGAAGC     | (GA)8                   | 107 | 83.7  | 55 |
| RM316  | 9  | CTAGTTGGGCATACGATGGC     | ACGCTTATATGTTACGTCAAC    | (GT)8-(TG)9(TTTG)4(TG)4 | 192 | 1.8   | 55 |
| RM257  | 9  | CAGTTCCGAGCAAGAGTACTC    | GGATCGGACGTGGCATATG      | (CT)24                  | 163 | 66.1  | 55 |
| RM215  | 9  | GAGCAGCAAGAGCAGCAGAGG    | CATGCTCGACTTCAGAAGCTTGG  | (CT)16                  | 173 | 99.4  | 55 |
| RM434  | 9  | GCCTCATCCCTCTAACCCTC     | CAAGAAAGATCAGTGCGTGG     | (TC)12                  | 152 | 57.7  | 55 |
| RM257  | 9  | CAGTTCCGAGCAAGAGTACTC    | GGATCGGACGTGGCATATG      | (CT)24                  | 147 | 66.1  | 55 |
| RM288  | 9  | CCGGTCAGTTCAAGCTCTG      | ACGTACGGACGTGACGAC       | (GA)7G6(GA)7            | 125 | 74.6  | 55 |
| RM474  | 10 | AAGATGTACGGGTGGCATTG     | TATGAGCTGGTGAGCAATGG     | (AT)13                  | 213 | 0     | 55 |
| RM271  | 10 | TCAGATCTACAATTCCATCC     | TCGGTGAGACCTAGAGAGCC     | (GA)15                  | 101 | 59.4  | 55 |
| RM6100 | 10 | TCCTCTACCAGTACCGCACC     | GCTGGATCACAGATCATTGC     | (CGA)8                  | 144 | 53.9  | 50 |
| RM484  | 10 | TCTCCCTCCTACCATTGTC      | TGCTGCCCTCTCTCTCTCTC     | (AT)9                   | 299 | 97.3  | 55 |
| RM552  | 11 | CGCAGTTGTGGATTTCAAGTG    | TGCTCAACGTTTACTGTCC      | (TAT)13                 | 195 | 40.6  | 55 |
| RM116  | 11 | TCACGCACAGCGTGCCGTTCTC   | CAAGATCAAGCCATGAAAGGAGGG | (CT)9                   | 234 | 26.5  | 55 |

|       |    |                       |                      |              |     |       |    |
|-------|----|-----------------------|----------------------|--------------|-----|-------|----|
| RM287 | 11 | TTCCCTGTTAAGAGAGAAATC | GTGTATTTGGTGAAAGCAAC | (GA)21       | 118 | 68.6  | 55 |
| RM209 | 11 | ATATGAGTTGCTGTCGTGCG  | CAACTTGCATCCTCCCCTCC | (CT)18       | 88  | 73.9  | 55 |
| RM206 | 11 | CCCATGCGTTTAACTATTCT  | CGTTCCATCGATCCGTATGG | (CT)21       | 134 | 102.9 | 55 |
| RM224 | 11 | ATCGATCGATCTTCACGAGG  | TGCTATAAAAGGCATTCGGG | (AAG)8(AG)13 | 157 | 120.1 | 55 |
| RM277 | 12 | CGGTCAAATCATCACCTGAC  | CAAGGCTTGCAAGGGAAG   | (GA)11       | 124 | 57.2  | 55 |
| RM235 | 12 | AGAAGCTAGGGCTAACGAAC  | TCACCTGGTCAGCCTCTTTC | (CT)24       | 124 | 101.8 | 55 |
| RM415 | 12 | CTTCGATCCATCATCCATGG  | ATTGCTGTACGCAGTTTCGG | (AT)21       | 227 | 0     | 55 |
| RM19  | 12 | CAAAAACAGAGCAGATGAC   | CTCAAGATGGACGCCAAGA  | (ATC)10      | 226 | 20.9  | 55 |

### List of markers used for the screening which are linked to reported QTLs

| SSR    | Chromosome number | Associated QTL                 | Forward primer             | Reverse primer         | Repeat motifs |
|--------|-------------------|--------------------------------|----------------------------|------------------------|---------------|
| RM 5   | 1                 | <i>yldp1.4</i>                 | TGCAACTTCTAGCTGCTCGA       | GCATCCGATCTTGATGGG     | (GA)14        |
| RM9    | 1                 | <i>yldp1.4</i>                 | GGTGCCATTGTCGTCCTC         | ACGGCCCTCATCACCTTC     | (GA)15GT(GA)2 |
| RM250  | 2                 | <i>yldp2.3, dtm2.7, nsp1.2</i> | GGTTCAAACCAAGCTGATCA       | GATGAAGGCCTTCCACGCAG   | (CT)17        |
| RM535  | 2                 | <i>yldp2.3, bm2.2</i>          | ACTACATACACGGCCCTTGC       | CTACGTGGACACCGTCACAC   | (AG)11        |
| RM434  | 9                 | <i>yldp9.1</i>                 | GCCTCATCCCTCTAACCCCTC      | CAAGAAAGATCAGTGCGTGG   | (TC)12        |
| RM166  | 2                 | <i>dtm2.7, nsp1.2, bm2.2</i>   | GGTCCTGGGTCAATAATTGGGTTACC | TTGCTGCATGATCCTAAACCGG | (T)12         |
| RM415  | 12                | <i>nt12.1</i>                  | CTTCGATCCATCATCCATGG       | ATTGCTGTACGCAGTTTCGG   | (AT)21        |
| RM3688 | 2                 | -                              | GTTGAATCAAGCTGTGCAGC       | AGCTAGGCAAAGCATGCATG   | (GA)15        |
| RM1920 | 2                 | -                              | CAAACACAGTGTTGACAGAA       | GCTATTGACTTATCCGTTCA   | (AT)18        |
| RM257  | 9                 | <i>yldp9.1, nfg1.2</i>         | CAGTTCCGAGCAAGAGTACTC      | GGATCGGACGTGGCATATG    | (CT)24        |
| RM288  | 9                 | <i>nfg1.2</i>                  | CCGGTCAGTTCAAGCTCTG        | ACGTACGGACGTGACGAC     | (GA)7G6(GA)7  |
| RM6318 | 2                 | -                              | TGCTGCTTCTGTCCAGTGAG       | GGATCATAACAAGTGCCTCG   | (CTT)12       |
| RM19   | 12                | <i>nt12.1</i>                  | CAAAAACAGAGCAGATGAC        | CTCAAGATGGACGCCAAGA    | (ATC)10       |
